# Supplementary material for: Extending Integrate-and-Fire Model Neurons to Account for the Effects of Weak Electric Fields and Input Filtering Mediated by the Dendrite
Source: PLOS journal article supplement (doi:10.1371/journal.pcbi.1005206), 2016-11-28
Supplement: S1 (10.1371/journal.pcbi.1005206.s001) [file journal.pcbi.1005206.s001]

— Supplementary material —

Extending integrate-and-fire model neurons to account for the effects of weak electric fields and input filtering mediated by the dendrite

Florian Aspart<sup>1,2,\*,\ddagger</sup>, Josef Ladenbauer<sup>1,2,\*,\ddagger</sup>, Klaus Obermayer<sup>1,2,\ddagger</sup>

1 Department of Software Engineering and Theoretical Computer Science, Technische Universität Berlin, Germany

2 Bernstein Center for Computational Neuroscience Berlin, Germany

\* These authors contributed equally to this work

\ddagger E-mail: florian.aspart@tu-berlin.de, josef.ladenbauer@tu-berlin.de, klaus.obermayer@tu-berlin.de

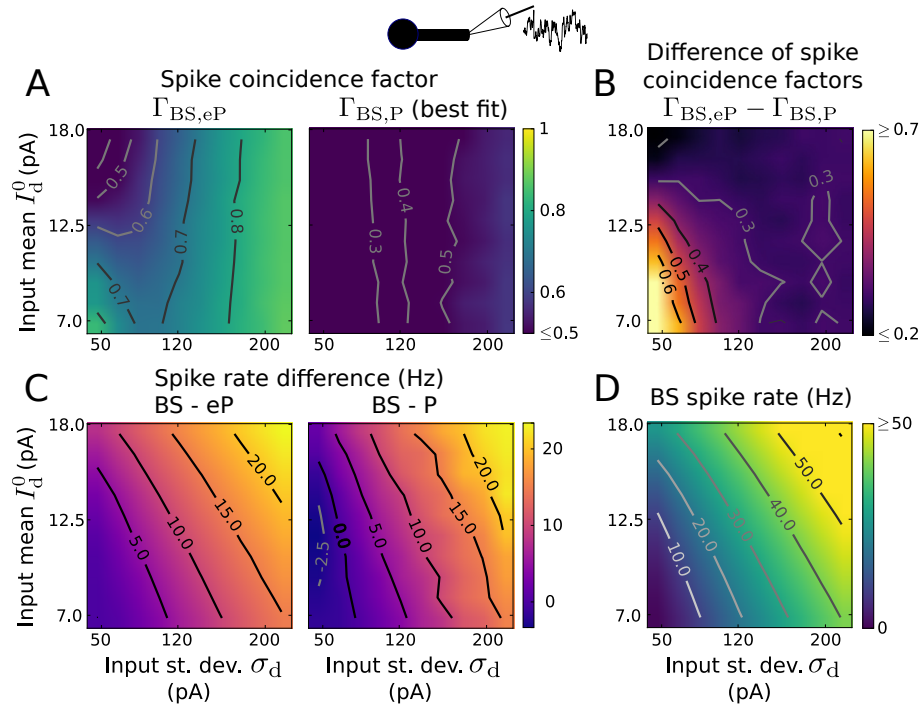

**Supplementary Figure A. Reproduction of spiking activity for dendritic inputs using EIF type models** A: Coincidence factor for the BS and eP model spike trains,  $\Gamma_{BS,eP}$  (left), and for the BS and P model spike trains,  $\Gamma_{BS,P}$  (left) as a function of input mean  $I_d^0$  and standard deviation  $\sigma_d$ . The parameter values of the P model were optimized to maximize  $\Gamma_{BS,P}$  for each input (i.e.,  $(I_d^0, \sigma_d)$ -pair) independently. B: Difference  $\Gamma_{BS,eP} - \Gamma_{BS,P}$  between the coincidence factors shown in B. C: Spike rate difference of the BS and eP models (left) and of the BS and P models (right) as a function of  $I_d^0$  and  $\sigma_d$ . D: Spike rate of the BS neuron model. Results presented in A-D show averages over 6 noise realizations. The parameter values of the BS model are listed in Table 1.

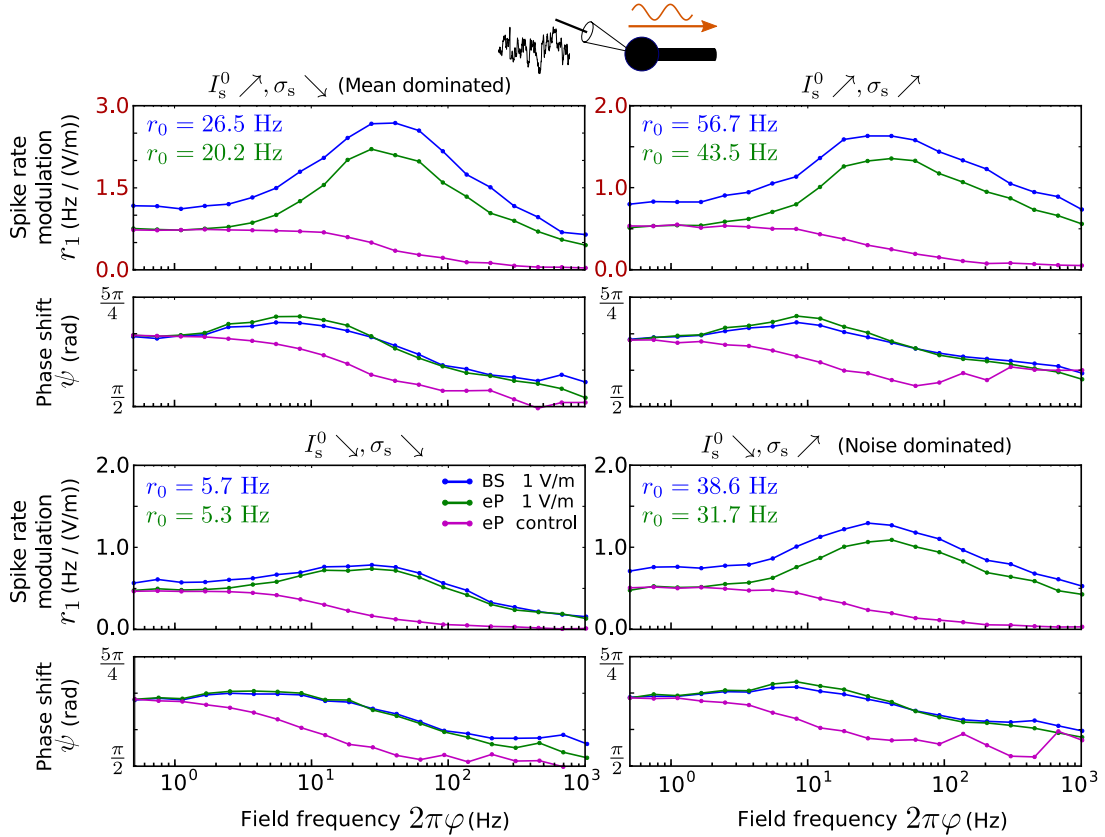

**Supplementary Figure B. Spike rate modulation due to an electric field for somatic inputs using neuron models of the EIF type** Spike rate modulation of the BS (blue) and the eP (green) models due to an oscillating electric field ( $E_1 = 1$  V/m) as a function of its frequency, for different somatic inputs:  $I_s^0 = 10.61$  pA,  $\sigma_s = 24.08$  pA (top left),  $I_s^0 = 10.61$  pA,  $\sigma_s = 68.21$  pA (top right),  $I_s^0 = 5.05$  pA,  $\sigma_s = 24.08$  pA (bottom left), and  $I_s^0 = 5.05$  pA,  $\sigma_s = 68.21$  pA (bottom right). Magenta lines show the spike rate modulation of the eP model for which  $I_E$  was given by  $I_E(t) = I_1 \sin(\varphi t + \phi)$  with constant amplitude  $I_1 = |B(0.5/(2\pi))|$  and phase shift  $\phi = \arg(B(0.5/(2\pi)))$  with  $B$  from Eq. 21 and  $E_1 = 10$  V/m. Note the different amplitude scales in the two top plots.

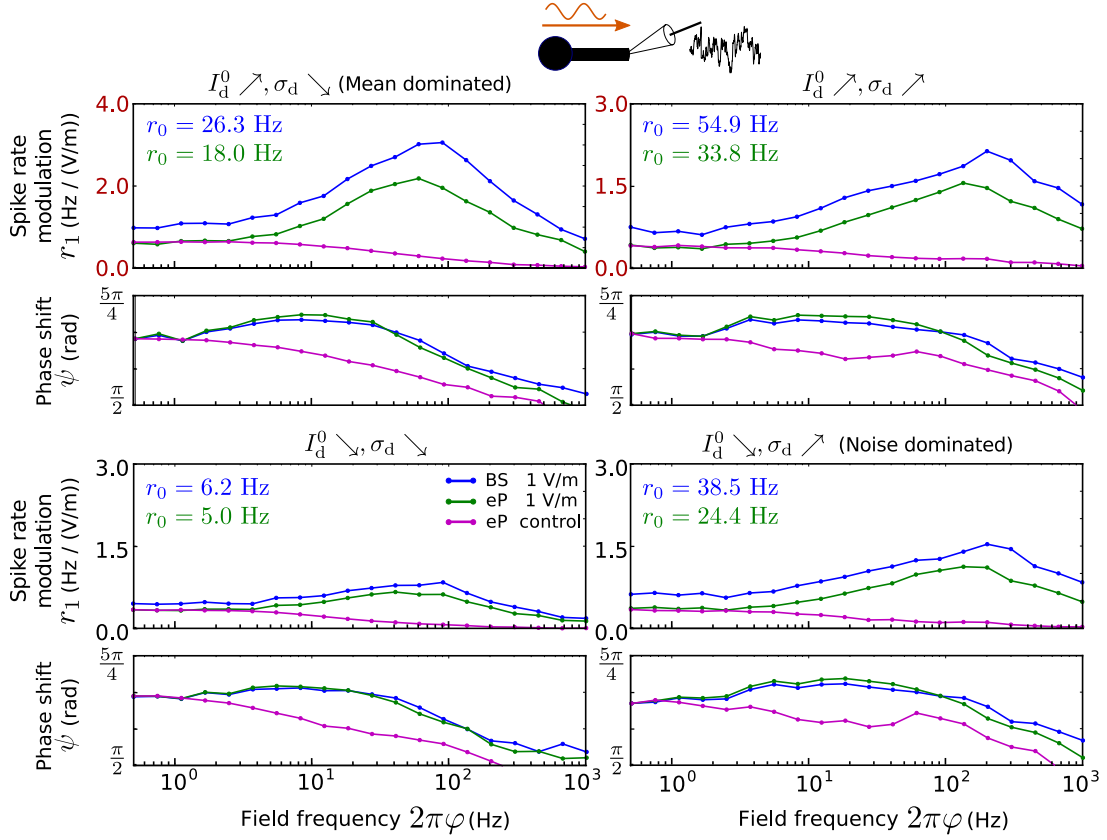

**Supplementary Figure C. Spike rate modulation due to an electric field for distal dendritic inputs using neuron models of the EIF type** Spike rate modulation of the BS (blue) and the eP (green) models due to an oscillating electric field ( $E_1 = 1$  V/m) as a function of its frequency, for different distal dendritic inputs:  $I_d^0 = 16.73$  pA,  $\sigma_d = 57.73$  pA (top left),  $I_d^0 = 16.73$  pA,  $\sigma_d = 203.41$  pA (top right),  $I_d^0 = 7.56$  pA,  $\sigma_d = 57.73$  pA (bottom left), and  $I_d^0 = 7.56$  pA,  $\sigma_d = 203.41$  pA (bottom right). Magenta lines show the spike rate modulation of the eP model for which  $I_E$  was given by  $I_E(t) = I_1 \sin(\varphi t + \phi)$  with constant amplitude  $I_1 = |B(0.5/(2\pi))|$  and phase shift  $\phi = \arg(B(0.5/(2\pi)))$  with  $B$  from Eq. 21 and  $E_1 = 10$  V/m. Note the different amplitude scales in the two top plots.
